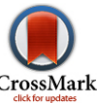

## Correction

# Correction: Bone Mineral Metabolism Parameters and Urinary Albumin Excretion in a Representative US Population Sample

The *PLOS ONE* Staff

The phrase “\_ENREF\_” mistakenly appears several times in the Introduction and Conclusion. This error was introduced during the typesetting process, and the phrase should not appear.

## Reference

1. Ellam T, Fotheringham J, Wilkie ME, Francis SE, Chico TJA (2014) Bone Mineral Metabolism Parameters and Urinary Albumin Excretion in a Representative US Population Sample. *PLoS ONE* 9(2): e88388. doi:10.1371/journal.pone.0088388

**Citation:** The *PLOS ONE* Staff (2014) Correction: Bone Mineral Metabolism Parameters and Urinary Albumin Excretion in a Representative US Population Sample. *PLoS ONE* 9(5): e97392. doi:10.1371/journal.pone.0097392

**Published:** May 7, 2014

**Copyright:** © 2014 The *PLOS ONE* Staff. This is an open-access article distributed under the terms of the Creative Commons Attribution License, which permits unrestricted use, distribution, and reproduction in any medium, provided the original author and source are credited.
